# Supplementary material for: Evaluating diabetes and hypertension disease causality using mouse phenotypes
Source: Springer Nature journal article supplement (doi:10.1186/1752-0509-4-97), 2010-07-20

A

## MGI mammalian phenotype ontology

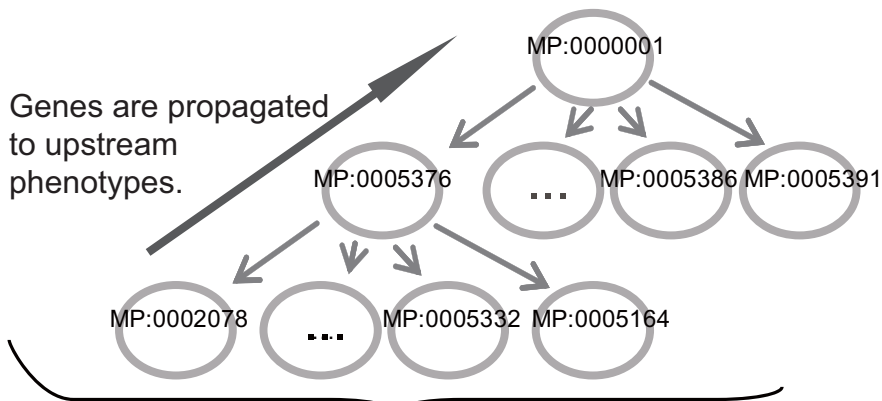

Select testable phenotypes

1) associated  $\geq 10$  genes; 2) keep lowest leaf nodesFor each phenotype ( $PT_i$ ) of a disease ( $D$ )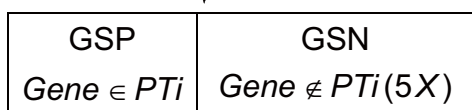Train a decision tree  
(Exemplary tree in Figure 1B)Repeat  $N = 100$  times  
to get stable resultFor each leaf in decision tree  
Probability =  $\#$  of GSP / ( $\#$  of GSP +  $\#$  of GSN)Average probability of a gene perturbation to  
generate phenotype  $PT_i$ :  $S_i = \sum Probability / N$ Down weight of frequent  
phenotypes:  $w_i = -\log_{10}(f_i)$ Likelihood of a gene perturbation to give rise to disease  $D$ :  $\frac{\sum (w_i * S_i)}{\sum w_i}$ 

B

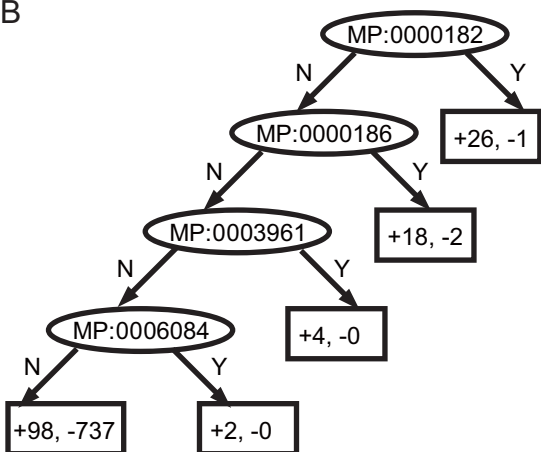

C

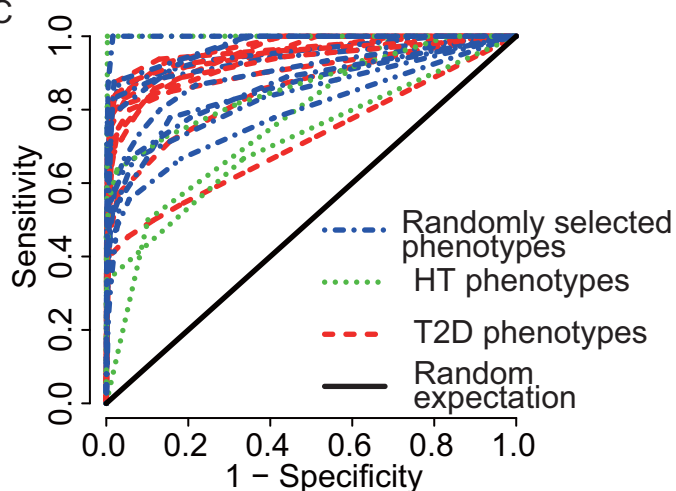

Supplement: 12918_2010_486_MOESM4_ESM.pdf [file 12918_2010_486_MOESM4_ESM.pdf]
